# Supplementary figures and images for: Emergence ofIxodes scapularis(Acari: Ixodidae) in a Small Mammal Population in a Coastal Oak-Pine Forest, Maine, USA
Source: Oxford University Press journal article supplement (doi:10.1093/jme/tjab209), 2021-12-27

a)

damage: none some heavy dead

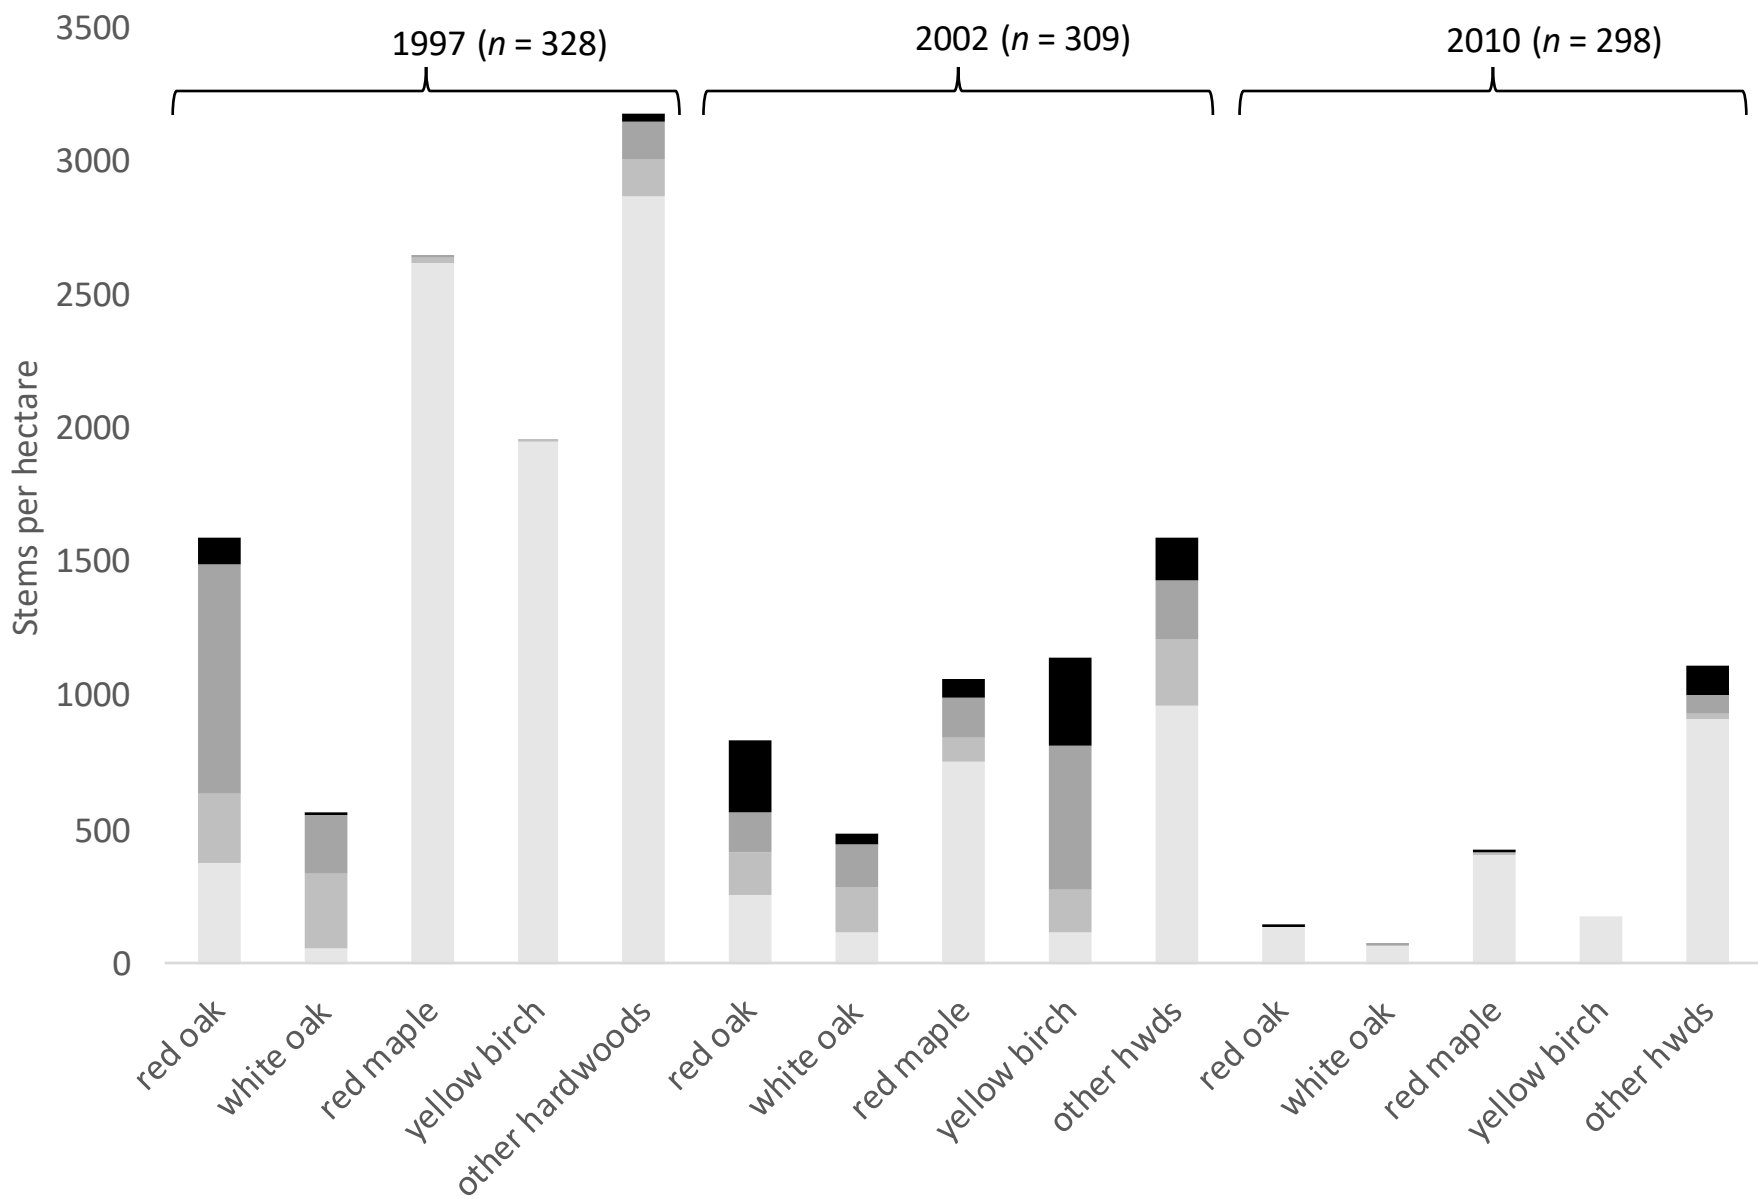

b)

unbrowsed browsed

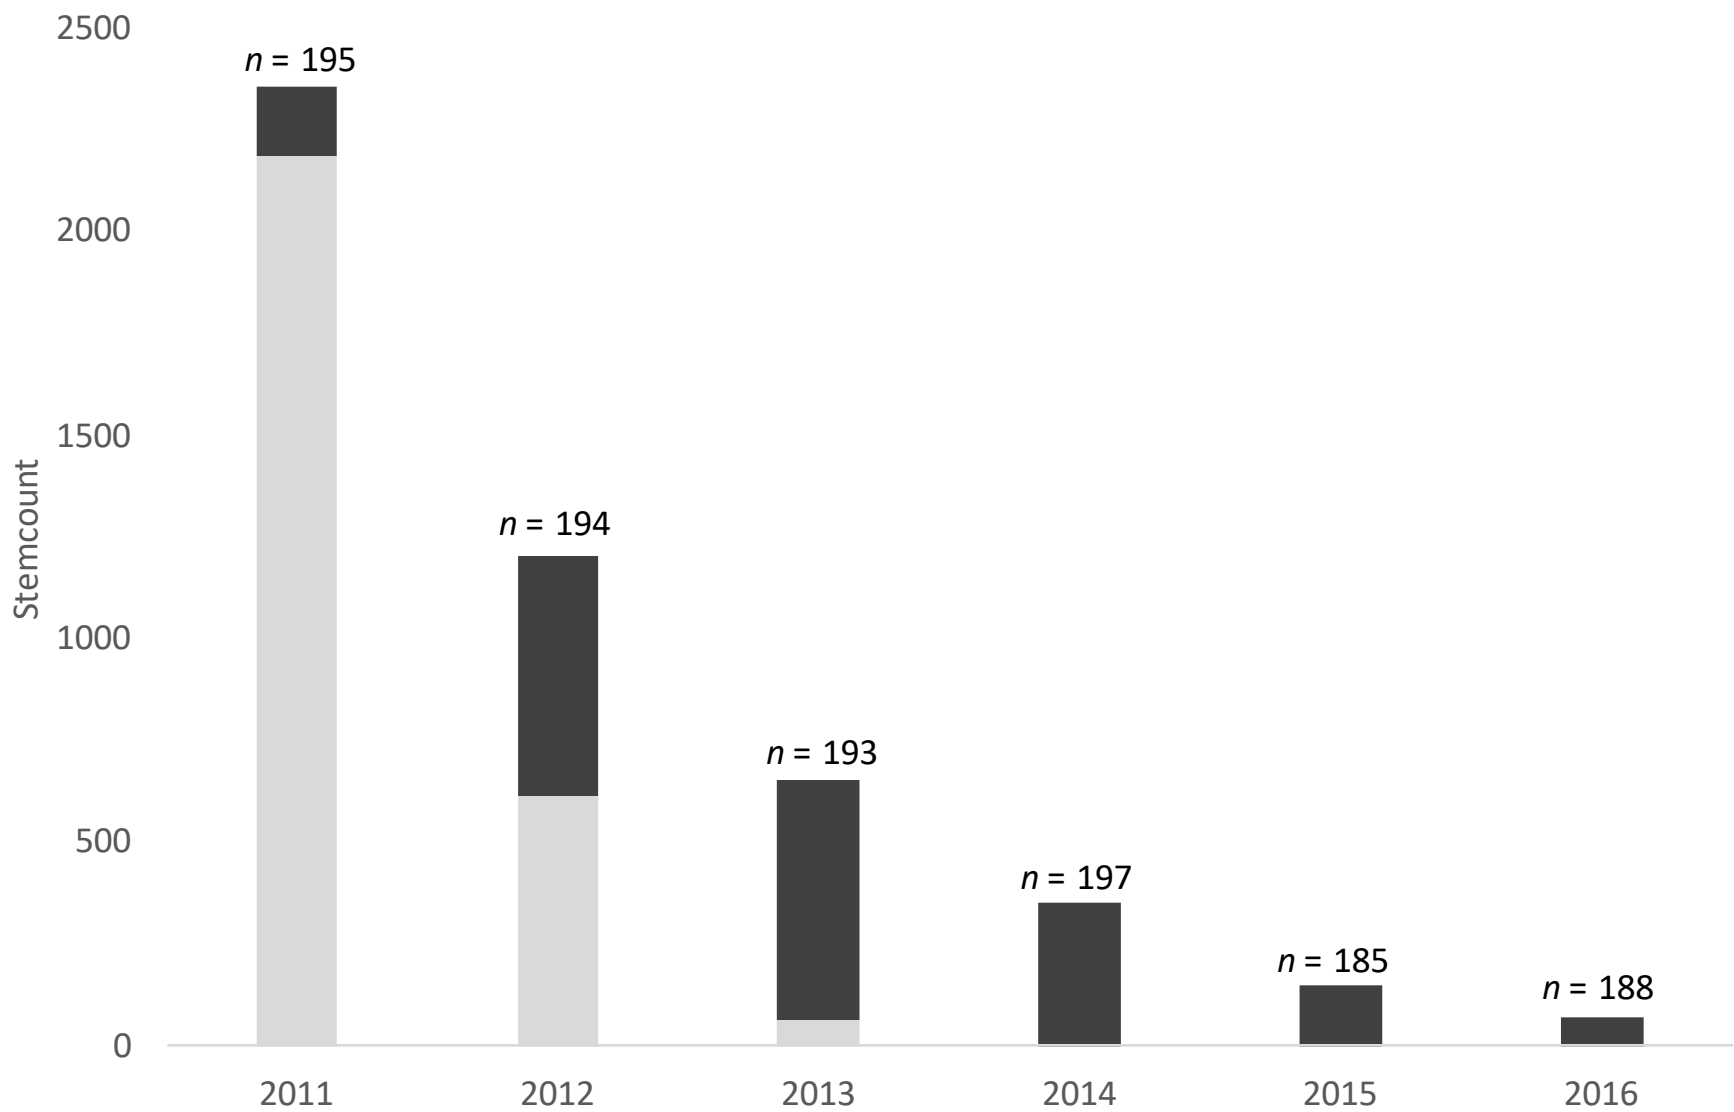

Supplement: tjab209_suppl_supplementary_figure_s1.pdf [file tjab209_suppl_supplementary_figure_s1.pdf]

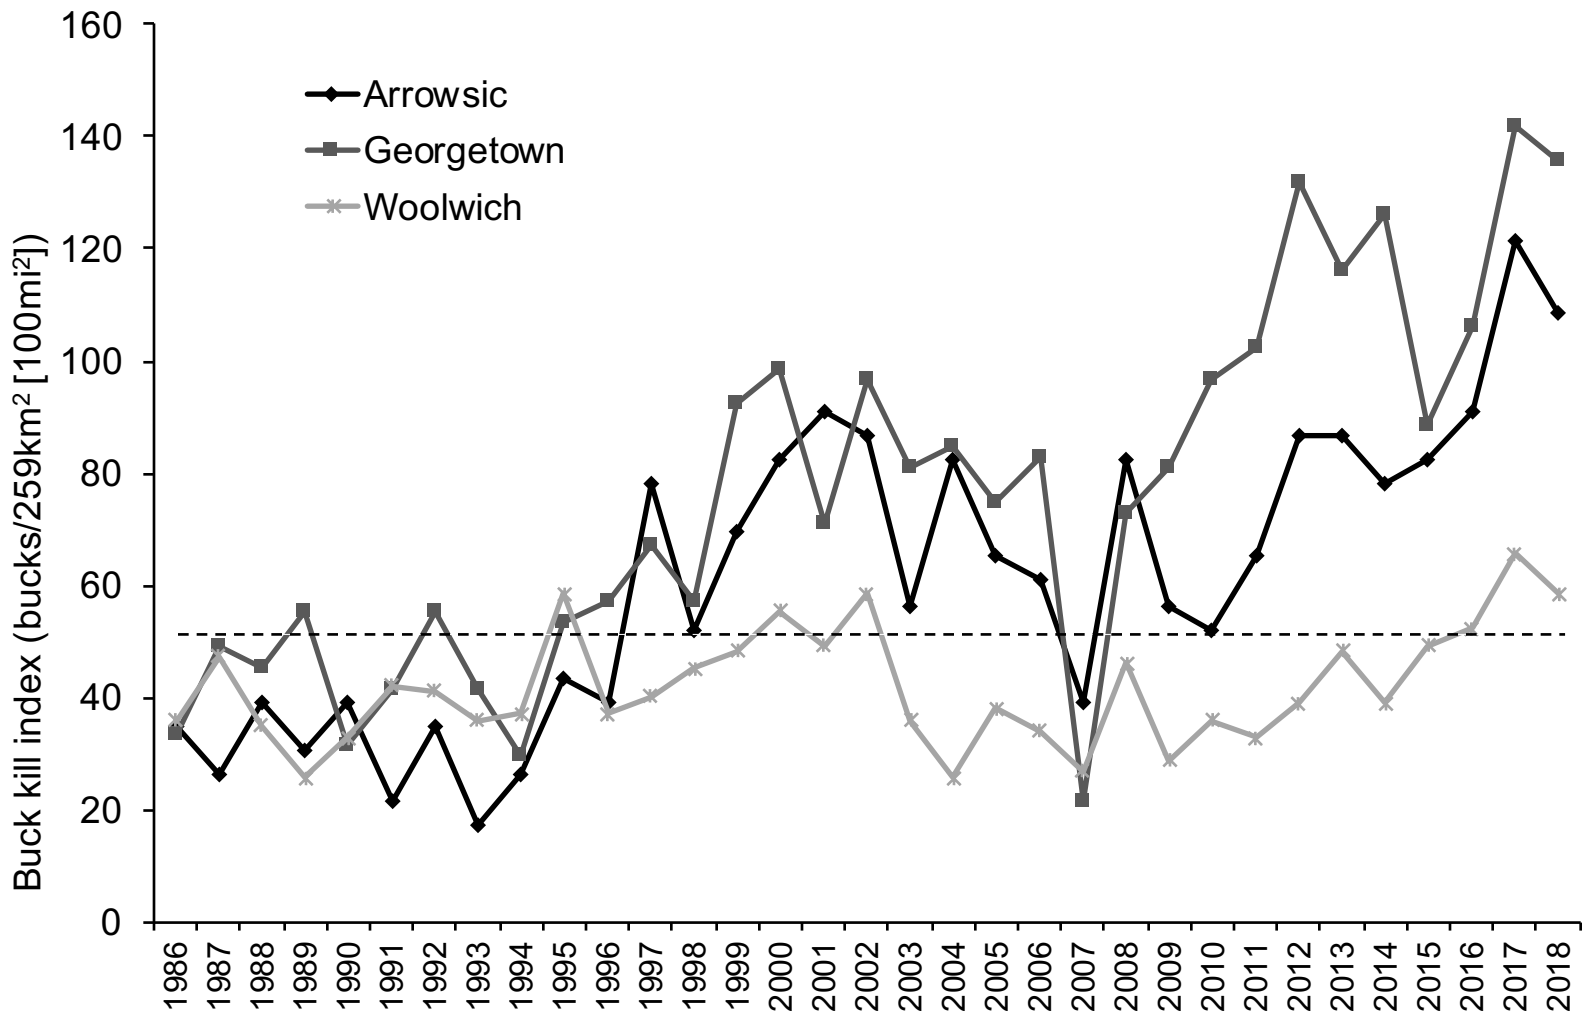

Supplement: tjab209_suppl_supplementary_figure_s2.pdf [file tjab209_suppl_supplementary_figure_s2.pdf]
